# Supplementary material for: In Leishmania major, the Homolog of the Oncogene PES1 May Play a Critical Role in Parasite Infectivity
Source: MDPI journal article supplement (doi:10.3390/ijms222212592), 2021-11-22
Supplement: s1 [file s1]

|                  |                                                                                                                            |      |
|------------------|----------------------------------------------------------------------------------------------------------------------------|------|
| LmjF_04.0810     | ATGGTCCATAAGAAGCAGGCATGGGCGAAGCGGGTGAAGAAGGAGCGCTTCAAGAAGAAATTTCTGACGCGCATGCAGGCGACGCGGCTACTGCAGATGGAGTCCGTTTCAGTTCGCCCGC  | 120  |
| LmjPES_sequenced | ATGGTCCATAAGAAGCAGGCATGGGCGAAGCGGGTGAAGAAGGAGCGCTTCAAGAAGAAATTTCTGACGCGCATGCAGGCGACGCGGCTACTGCAGATGGAGTCCGTTTCAGTTCGCCCGC  | 120  |
| *****            |                                                                                                                            |      |
| LmjF_04.0810     | CTCTGCATCCTCAAGGGCATCTACCCCCGCGCCCTCAACCGCAGCAAGCAGAAACAAGTGGGAACGAGAAGCAGTACTATCTCGCCCGTGAGATCAAGTGGCTGGTGCGCACCAGATA     | 240  |
| LmjPES_sequenced | CTCTGCATCCTCAAGGGCATCTACCCCCGCGCCCTCAACCGCAGCAAGCAGAAACAAGTGGGAACGAGAAGCAGTACTATCTCGCCCGTGAGATCAAGTGGCTGGTGCGCACCAGATA     | 240  |
| *****            |                                                                                                                            |      |
| LmjF_04.0810     | GCGGAGAAGATGATGGCATATCGGGCATGGGAGAAGAAGGTGAAGCGGGCAGAGGCGATGGGCCGCTCCGAGGACCTCAAGGTGCTGCAGACCTCACGCGTGAAGCCGCGCCACAGCCTG   | 360  |
| LmjPES_sequenced | GCGGAGAAGATGATGGCATATCGGGCATGGGAGAAGAAGGTGAAGCGGGCAGAGGCGATGGGCCGCTCCGAGGACCTCAAGGTGCTGCAGACCTCACGCGTGAAGCCGCGCCACAGCCTG   | 360  |
| *****            |                                                                                                                            |      |
| LmjF_04.0810     | GTGGCGACGATCAAGGAGCGCTACCCATACTTCATCGACGCCATCCGTGACGTGGATGACGCCATGTTCGATGATCCACCTTTACGCCTTCCTTAGCCCCGAGATCAAGTCCGATACCACC  | 480  |
| LmjPES_sequenced | GTGGCGACGATCAAGGAGCGCTACCCATACTTCATCGACGCCATCCGTGACGTGGATGACGCCATGTTCGATGATCCACCTTTACGCCTTCCTTAGCCCCGAGATCAAGTCCGATACCACC  | 480  |
| *****            |                                                                                                                            |      |
| LmjF_04.0810     | ATCGAGATACATCACTCCCTCACCTCCGGCTGAGCGAGAGGGCCAAGGAGGTGTGCGAACGCTGGGACCGCTACGTCGCACGCGCGCTGTACTGACGAAGGGCTTCATCTCCATCAAG     | 600  |
| LmjPES_sequenced | ATCGAGATACATCACTCCCTCACCTCCGGCTGAGCGAGAGGGCCAAGGAGGTGTGCGAACGCTGGGACCGCTACGTCGCACGCGCGCTGTACTGACGAAGGGCTTCATCTCCATCAAG     | 600  |
| *****            |                                                                                                                            |      |
| LmjF_04.0810     | GGCTACTACTACGAGGCGATTGTCAAGGGCGAGCGGGTGCGGTGGCTGTGCCCGCACGAGTACGCTCACCGCTTCCCCCGGGCATCCAGCAATACGTGATGCTCAGCTTCCTCGAATTC    | 720  |
| LmjPES_sequenced | GGCTACTACTACGAGGCGATTGTCAAGGGCGAGCGGGTGCGGTGGCTGTGCCCGCACGAGTACGCTCACCGCTTCCCCCGGGCATCCAGCAATACGTGATGCTCAGCTTCCTCGAATTC    | 720  |
| *****            |                                                                                                                            |      |
| LmjF_04.0810     | TACCTGGAGATGATGAAGTTCGTCTCTGTTCAAGCTCGAGTCGGACCTCGCGCGCGATGAGGCGGACCGCTGGCGGCGGAGGATGAGGAAGGTGTGACCGCGCGAACGCCGAGGACTTC    | 840  |
| LmjPES_sequenced | TACCTGGAGATGATGAAGTTCGTCTCTGTTCAAGCTCGAGTCGGACCTCGCGCGCGATGAGGCGGACCGCTGGCGGCGGAGGATGAGGAAGGTGTGACCGCGCGAACGCCGAGGACTTC    | 840  |
| *****            |                                                                                                                            |      |
| LmjF_04.0810     | GCGAACGGTGCGGCGCTGGCCGTGCTGGATGTAGGCGCGAACAGGCGCAGGCCAAGGCGGTGAAGGAGGCGGAGTCAAGCGCTCTTTGATGGAGGAAGAGCTGCACAAGGTGCGCGAG     | 960  |
| LmjPES_sequenced | GCGAACGGTGCGGCGCTGGCCGTGCTGGATGTAGGCGCGAACAGGCGCAGGCCAAGGCGGTGAAGGAGGCGGAGTCAAGCGCTCTTTGATGGAGGAAGAGCTGCACAAGGTGCGCGAG     | 960  |
| *****            |                                                                                                                            |      |
| LmjF_04.0810     | CTGTTCCGCGGGCTAACCTTCTTCATATCGCGTGAGGTGCCCGCGAAGCACTTCGCCCTCGTCATCAACGCTGCGGCGGCGGTGTGGCGACCGACTACGTGCCGTGCAACATCACTCAC    | 1080 |
| LmjPES_sequenced | CTGTTCCGCGGGCTAACCTTCTTCATATCGCGTGAGGTGCCCGCGAAGCACTTCGCCCTCGTCATCAACGCTGCGGCGGCGGTGTGGCGACCGACTACGTGCCGTGCAACATCACTCAC    | 1080 |
| *****            |                                                                                                                            |      |
| LmjF_04.0810     | GTCGTTGTTGACCGCCCCGCGCTGCCGCCAGGGATGAAAAAGCATGACCAGCTGGAGTACGTGCAGCCGAGTACATCTTCGACTGCCTGAACGCGCGGCTGGTGCTCCCGGTGACGGGC    | 1200 |
| LmjPES_sequenced | GTCGTTGTTGACCGCCCCGCGCTGCCGCCAGGGATGAAAAAGCATGACCAGCTGGAGTACGTGCAGCCGAGTACATCTTCGACTGCCTGAACGCGCGGCTGGTGCTCCCGGTGACGGGC    | 1200 |
| *****            |                                                                                                                            |      |
| LmjF_04.0810     | TACCGCATTTGGTGAGGAGCTGCCGCGCAGCTGTGCGCCCTTCTCTGTCTCCATCACGAACCTCCGCCGAGGACAACGCGGCGGTGGTGCAAGTGAAGAAGGACCACCCGAGGATTGTGGGC | 1320 |
| LmjPES_sequenced | TACCGCATTTGGTGAGGAGCTGCCGCGCAGCTGTGCGCCCTTCTCTGTCTCCATCACGAACCTCCGCCGAGGACAACGCGGCGGTGGTGCAAGTGAAGAAGGACCACCCGAGGATTGTGGGC | 1320 |
| *****            |                                                                                                                            |      |
| LmjF_04.0810     | TACGTGCCGCGCGCGTGCATGAGATCCGCAAGCTGATCAACCCCTCTTACTCTGCGGTGCACCCAGAGGGGAAGGTGGCGCATCTGGAGGACGAGTACAGCGACGAAGAGTCTCACGTG    | 1440 |
| LmjPES_sequenced | TACGTGCCGCGCGCGTGCATGAGATCCGCAAGCTGATCAACCCCTCTTACTCTGCGGTGCACCCAGAGGGGAAGGTGGCGCATCTGGAGGACGAGTACAGCGACGAAGAGTCTCACGTG    | 1440 |
| *****            |                                                                                                                            |      |
| LmjF_04.0810     | GCGGTGCCGAGATGGACATGGAGGACGATGTCTCGCTCTCCGGTGACGAGCTTGCGGAGGCACGCAGGAAGCCGGCGTGGCAGGAAGAGGAGGTCACGGAGGAGGTGCAGCGGCCGAAG    | 1560 |
| LmjPES_sequenced | GCGGTGCCGAGATGGACATGGAGGACGATGTCTCGCTCTCCGGTGACGAGCTTGCGGAGGCACGCAGGAAGCCGGCGTGGCAGGAAGAGGAGGTCACGGAGGAGGTGCAGCGGCCGAAG    | 1560 |
| *****            |                                                                                                                            |      |
| LmjF_04.0810     | CTGTGCGCGTTCAAGGTGAAGAAGCAGCGCGAGATGAACCTGATGAACGCGCCGACGAACGAAGTGGTGGCGCGGCGGCGGCGAGGCACTGCGCAAGGCGCAGGAGAAGTACGTCAGACG   | 1680 |
| LmjPES_sequenced | CTGTGCGCGTTCAAGGTGAAGAAGCAGCGCGAGATGAACCTGATGAACGCGCCGACGAACGAAGTGGTGGCGCGGCGGCGGCGAGGCACTGCGCAAGGCGCAGGAGAAGTACGTCAGACG   | 1680 |
| *****            |                                                                                                                            |      |

LmjF.04.0810  
LmjPES\_sequenced

GAGACGTCCGAGGCACGTCTGCAGCGCAAGATGAGCGAGGTGAAGCGCCAGGAGCGGCGACGCGCAAGATGCAGCTGCAGGTCGCCCCGAAGAAGGCAGCACGTTTTTACAAGATGGTC 1800  
GAGACGTCCGAGGCACGTCTGCAGCGCAAGATGAGCGAGGTGAAGCGCCAGGAGCGGCGACGCGCAAGATGCAGCTGCAGGTCGCCCCGAAGAAGGCAGCACGTTTTTACAAGATGGTC 1800  
\*\*\*\*\*

LmjF.04.0810  
LmjPES\_sequenced

AGCGGTGTGGTGCAGGGCACGGCGAAGAAGGTGGCGACGCTGGAGGCCAAAGGCAAAGCACATCGCCGAAGGGAAGCTGCGTAAGACCGAGGATGGCAAGGGACTTGTCAACAAGCGGCTG 1920  
AGCGGTGTGGTGCAGGGCACGGCGAAGAAGGTGGCGACGCTGGAGGCCAAAGGCAAAGCACATCGCCGAAGGGAAGCTGCGTAAGACCGAGGATGGCAAGGGACTTGTCAACAAGCGGCTG 1920  
\*\*\*\*\*

LmjF.04.0810  
LmjPES\_sequenced

ATCGCCGAAGGGAAGCTGCGTAAGACCGAGGATGGCAAGGGACTTGTCAACAAGCGGCTGGAGGCGCGACGGCAGCGAGCTGAGGCCAAGGGCAAGAAGCTCAAGGAGAGGAAGGCTGGC 1980  
ATCGCCGAAGGGAAGCTGCGTAAGACCGAGGATGGCAAGGGACTTGTCAACAAGCGGCTGGAGGCGCGACGGCAGCGAGCTGAGGCCAAGGGCAAGAAGCTCAAGGAGAGGAAGGCTGGC 1980  
\*\*\*\*\*

LmjF.04.0810  
LmjPES\_sequenced

AACCCGTACAAGAACTGCCCAAGTGGGTGCAGTAA 2016  
AACCCGTACAAGAACTGCCCAAGTGGGTGCAGTAA 2016  
\*\*\*\*\*
